# Supplementary material
Source: HighWire-hosted journal article supplement (https://err.ersjournals.com/content/29/155/190107)
Supplement: inline-supplementary-material-9 [file inline-supplementary-material-9.docx]

|  | **Random sequence generation** | **Allocation concealment** | **Blinding of outcome assessment** | **Incomplete outcome data** | **Selective reporting** | **Other bias** |
| --- | --- | --- | --- | --- | --- | --- |
| **Mahmoodpoor et al. 2017** | 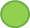 | 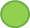 | 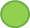 | 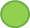 | 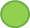 | 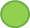 |
| **Deem et al. 2016** | 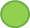 | 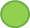 | 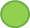 | 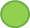 | 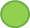 | 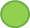 |
| **Jena et al. 2016** | 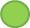 | 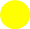 | 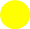 | 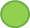 | 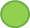 | 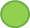 |
| **Gopal et al. 2015** | 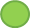 | 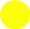 | 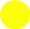 | 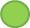 | 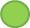 | 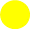 |
| **Damas et al. 2015** | 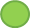 | 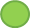 | 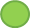 | 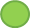 | 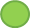 | 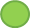 |
| **Tao et al. 2014** | 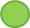 | 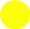 | 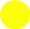 | 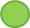 | 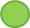 | 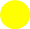 |
| **Seyfi et al. 2013** | 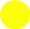 | **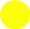** | 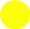 | 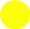 | 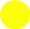 | 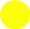 |
| **Lacherade et al. 2010** | 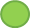 | 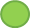 | 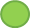 | 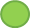 | 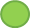 | 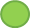 |
| **Zheng et al. 2008** | 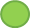 | 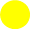 | 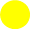 | 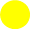 | 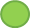 | 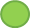 |
| **Yang et al. 2008** | 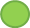 | 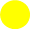 | 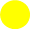 | 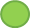 | 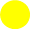 | 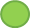 |
| **Bouza et al. 2008** | 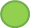 | 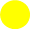 | 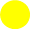 | 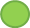 | 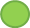 | 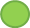 |
| **Lorente et al. 2007** | 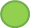 | 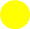 | 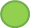 | 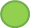 | 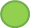 | 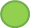 |
| **Liu QH et al. 2006** | 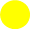 | 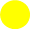 | 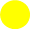 | 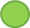 | 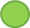 | 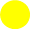 |
| **Liu SH et al. 2006** | 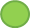 | 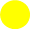 | 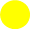 | 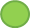 | 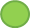 | 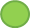 |
| **Girou et al. 2004** |  | 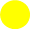 |  | 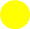 |  |  |
| **Smulders et al. 2002** |  | 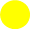 |  |  |  |  |
| **Bo et al. 2000** | 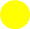 | 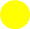 | 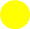 | 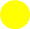 |  |  |
| **Kollef et al. 1999** | 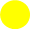 |  | 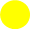 | 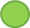 | 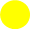 | 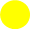 |
| **Valles et al. 1995** | 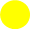 | 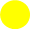 | 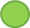 | 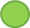 |  |  |
| **Mahul et al. 1992** |  |  |  |  |  |  |

Low risk of bias

Unclear risk of bias

High risk of bias

**Supplemental digital content 8**. Risk of bias assessments for included randomized controlled trials

Low risk of bias

Unclear risk of bias

High risk of bias
